# Supplementary material for: Two new species in a new genus and a critical revision of Brachybasidiaceae (Exobasidiales, Basidiomycota) in honor of Franz Oberwinkler
Source: Springer Nature journal article supplement (doi:10.1007/s11557-020-01564-w), 2020-03-11
Supplement: MOESM1 [file 11557_2020_1564_MOESM1_ESM.xlsx]

## Sheet: Tabelle1
Online Resource 1 for "Two new species in a new genus of Brachybasidiaceae (Exobasidiales, Basidiomycota) in honor of Franz Oberwinkler" by M. Piepenbring, M. Hartmann, T.A. Hofmann, M. Lutz; corresponding author M. Piepenbring, Goethe-University Frankfurt am Main, piepenbring@bio.uni-frankfurt.de
	Family	Validity/Tax. level	Species/Genus/Family	Author/Host plant	Reference/Host Family	Year/Country	Literature	Comment
1	Brachybasidiaceae	genus	Brachybasidium	Gäum.	Annls mycol. 20(5/6): 269 (1922)	1922
2		family	Brachybasidiaceae	Gäum.	Vergl. Morph. Pilze (Jena): 489 (1926)	1926
3	Brachybasidiaceae	valid, type species	Brachybasidium pinangae	(Racib.) Gäum.	Annls mycol. 20(5/6): 270 (1922)	1922
4			Brachybasidium pinangae	on Pinanga spp.	Arecaceae	Indonesia (Java, mounts Salak and Gedeh)	Raciborski 1900: 35
5			Brachybasidium pinangae	on Pinanga cf. kuhlii Bl.	Arecaceae	Indonesia (Java, mounts Salak and Gedeh)	Gäumann 1922: 264
6	Brachybasidiaceae	genus	Dicellomyces	L.S. Olive	Mycologia 37(5): 544 (1945)	1945
7	Brachybasidiaceae	valid	Dicellomyces calami	Berndt & N.D. Sharma	Mycol. Res. 102(12): 1484 (1998)	1998		doubtful because of unusual host family
8			Dicellomyces calami	on Calamus cf. rotangis L.	Arecaceae	India	Berndt & Sharma 1998: 1484
9	Brachybasidiaceae	valid, type species	Dicellomyces gloeosporus	L.S. Olive	Mycologia 37(5): 544 (1945)	1945
10			Dicellomyces gloeosporus	on Arundinaria tecta (Walter) Muhl.	Poaceae	USA (Georgia, North Carolina)	Olive 1945: 544
11	Brachybasidiaceae	valid	Dicellomyces scirpi	Raitv.	in Parmasto, Eesti NSV Tead. Akad. Toim., Biol. seer 17(2): 223 (1968)	1968		doubtful because of unusual host family and molecular sequence data
12			Dicellomyces scirpi	on Scirpus sylvaticus L.	Cyperaceae	Estonia	Parmasto 1968: 223
13			Dicellomyces scirpi	on Scirpus sylvaticus L.	Cyperaceae	England	Reid 1976: 537
14		family	Dicellomycetaceae	Parmasto	Eesti NSV Tead. Akad. Toim., Biol. seer 17(2): 226 (1968)
15	Brachybasidiaceae	genus	Exobasidiellum	Donk	Medded. Nedl. Mycol. Ver. 18-20: 97 (1931)	1931
16	not Exobasidiales		Exobasidiellum culmigenum	R.K. Webster & D.A. Reid	R.K. Webster & D.A. Reid, Trans. Br. mycol. Soc. 52(1): 20 (1969)		Bandoni & Johri 1975: 2562
17	not Exobasidiales		Exobasidiellum culmigenum	on Dactylis glomerata L.	Poaceae	England	Reid 1969: 21
18	Brachybasidiaceae	valid, type species	Exobasidiellum graminicola	(Bres.) Donk	Persoonia 4(3): 256 (1966)	1966
19			Exobasidiellum graminicola	(no information on host species)	Poaceae	1966	Donk 1966: 256
20	Brachybasidiaceae	basionym of Exobasidiellum graminicola	Exobasidium graminicola	Bres.	in Krieger, Fung. Saxon. Exsicc., Pilze Sachsen's: no. 664 (1892)	1892
21	Brachybasidiaceae	basionym of K. tradescantiae	Exobasidium tradescantiae	Pat.	in Patouillard & Lagerheim 1892 , Bull. Soc. mycol. Fr. 8(3): 118 (1892)	1892
22	Brachybasidiaceae	genus	Kordyana	Racib.	Parasit. Alg. Pilze Java's (Jakarta) 2: 35 (1900)	1900
23	Brachybasidiaceae	valid	Kordyana aneilemae	Sawada	Dept. Agric. Gov. Res. Inst. Formosa, Rept. 51: 66 (1931)	1931
24			Kordyana aneilemae	on Aneilema angustifolium N.E. Br.	Commelinaceae	Taiwan	Sawada 1931: 66
25	Brachybasidiaceae	valid	Kordyana boswelliae	Thirum., Patel, G.W. Dhande & V.V. Bhatt	Indian Phytopath. 9: 12 (1956)	1956		doubtful because of unusual host family
26			Kordyana boswelliae	on Boswellia sp.	Burseraceae	India (Mumbai, formerly Bombay)	Thirumalachar et al. 1956: 13
27	Brachybasidiaceae	valid	Kordyana brasiliensis	D.M. Macedo, O.L. Pereira & R.W. Barreto	in Macedo, Pereira, Hora Junior, Weir & Barreto, Aust. Pl. Path. 45(1): 51 (2015)	2015
28			Kordyana brasiliensis	on Tradescantia fluminensis Vell.	Commelinaceae	2016	Macedo et al. 2016: 51
29	Brachybasidiaceae	valid	Kordyana celebensis	Gäum.	Annls mycol. 20(5/6): 257 (1922)	1922
30			Kordyana celebensis	on Commelina beghalensis L.	Commelinaceae	Guinea	Kranz 1964: 180
31			Kordyana celebensis	on Commelina beghalensis L.	Commelinaceae	Indonesia (South Sulawesi, (formerly Celebes))	Gäumann 1922: 257
32			Kordyana celebensis	on Commelina beghalensis L.	Commelinaceae	Malawi	Peregrine & Siddiqi 1972: 15, Barreto & Evans 1988: 91 (cited as Kordyana cubensis)
33			Kordyana celebensis	on Commelina diffusa Burm. f.	Commelinaceae	Mexico (Vera Cruz)	Barreto & Evans 1988: 91 (fungus cited as Kordyana cubensis)
34	Brachybasidiaceae	later homonym, Nom. illegit., Art. 53.1	Kordyana commelinae	Sawada	Report of the Department of Agriculture, Government Research Institute of Formosa 4: 85 (1922)	1922
			Kordyana commelinae Sawada	on Commelina nudiflora L.	Commelinaceae	Taiwan	Sawada 1922: 85
35	Brachybasidiaceae	valid	Kordyana commelinae	Petch	Ann. R. bot. Gdns Peradeniya 7(4): 288 (1922)	1922
36			Kordyana commelinae	on Commelina nudiflora L.	Commelinaceae	Sri Lanka (Ceylon, Haputale)	Petch 1922: 288
37	Brachybasidiaceae	valid	Kordyana cyphelloidis	Viégas	Bragantia 5: 253 (1945)	1945		doubtful because of unusual host family and morphology (with peridium, like cyphelli)
38			Kordyana cyphelloidis	on indet.	Bignoniaceae	Brazil (Sao Paulo)	Viégas 1945: 253
39	Brachybasidiaceae		Kordyana indica	Gäum.	Annls mycol. 20(5/6): 264 (1922)	1922		without diagnosis
40			Kordyana indica	on Cyanotis capitata C.B. Clarke	Commelinaceae	Indonesia (Java, Bogor)	Raciborski 1900: 35, cited as Kordyana tradescantiae (comp. Gäumann 1922: 263)
41			Kordyana indica	on Commelina obliqua Ham.	Commelinaceae	Indonesia (Java, Tjibodas)	Gäumann 1922: 263
42			Kordyana indica	on Commelina sp.	Commelinaceae	Indonesia (South Sulawesi, (formerly Celebes))	Gäumann 1922: 263
43	Brachybasidiaceae	basionym of Brachybasidium pinangae	Kordyana pinangae	Racib.	Parasit. Alg. Pilze Java's (Jakarta) 2: 35 (1900)	1900
44	Brachybasidiaceae	valid	Kordyana polliae	Gäum.	Annls mycol. 20(5/6): 261 (1922)	1922
45			Kordyana polliae	on Pollia sorzogonensis Endl.	Commelinaceae	Indonesia (South Sulawesi, (formerly Celebes))	Gäumann 1922: 261
46	Brachybasidiaceae	syn. of Kordyana polliae acc. to IF	Kordyana polliae var. microspora	Narendra & V.G. Rao	Curr. Sci. 46(19): 678 (1977)	1977		may represent a separate species
47			Kordyana polliae var. microspora	on Commelina maculata Edgew.	Commelinaceae	India	Narendra & Rao 1977: 677
48	Brachybasidiaceae	not validly published	Kordyana polliniae	Sawada	Rep. Govt Res. Inst. Dep. Agric., Formosa 85: 54 (1943)	1943		not validly published
49			Kordyana polliniae	on Pollinia japonica Miq.	Poaceae	Taiwan	Sawada 1943: 54	doubtful because of unusual host family
50	Brachybasidiaceae	valid, type species	Kordyana tradescantiae	(Pat.) Racib.	Parasit. Alg. Pilze Java's (Jakarta) 2: 35 (1900)	1900
51			Kordyana tradescantiae	on Tradescantia sp., Tradescantia aff. adamsi (name not found), Tradescantia poelliae D.R. Hunt	Commelinaceae	Costa Rica	Gómez & Kisimova-Horovitz 1997: 1300
52			Kordyana tradescantiae	on Tradescantia sp.	Commelinaceae	Ecuador	Patouillard & Lagerheim 1892: 118, cited as Exobasidium tradescantiae
53			Kordyana tradescantiae	on Aneilema ovato-oblongum P. Beauv., Callisia umbellulata Lam., Tradescantia sp.	Commelinaceae	Ecuador	Petrak 1950: 451
54			Kordyana tradescantiae	on Aneilema ovato-oblongum P. Beauv., Callisia umbellulata Lam., Tradescantia sp.	Commelinaceae	Ecuador	Dennis 1970: 85
55			Kordyana tradescantiae	on Tradescantia polliae D.R. Hunt.	Commelinaceae	Panama	Piepenbring et al. 2010: 241
56			Kordyana tradescantiae	on Tradescantia ohiensis Raf.	Commelinaceae	USA	Leahy 2009, information from internet cited by Piepenbring et al. 2010
57	cf. Cryptobasidiaceae	genus	Lelum	Racib.	Parasit. Alg. Pilze Java's (Jakarta) 3: 16 (1900)	1900
58	cf. Cryptobasidiaceae	valid, type species	Lelum ustilaginoides	Racib.	Parasit. Alg. Pilze Java's (Jakarta) 3: 16 (1900)	1900
59	Brachybasidiaceae	genus	Marantokordyana	M. Piepenbr., Maike Hartmann, T.A. Hofm. & M. Lutz	present publication
60	Brachybasidiaceae	type species	Marantokordyana oberwinkleriana	M. Piepenbr., Maike Hartmann, T.A. Hofm. & M. Lutz	present publication
61			Marantokordyana oberwinkleriana	on Goeppertia panamensis (Rowlee) Borchs. & S. Suárez	Marantaceae	Bolivia	present publication
62	Brachybasidiaceae		Marantokordyana boliviana	M. Piepenbr., Maike Hartmann, T.A. Hofm. & M. Lutz	present publication
63			Marantokordyana boliviana	on Goeppertia propinqua (Poepp. & Endl.) Borchs. & S. Suárez	Marantaceae	Panama	present publication
64	Brachybasidiaceae	genus	Meira	Boekhout, Scorzetti, Gerson & Sztejnb.	in Boekhout, Theelen, Houbraken, Robert & Scorzetti, Int. J. Syst. Evol. Microbiol. 53(5): 1660 (2003)	2003
65	Brachybasidiaceae	valid	Meira argovae	Boekhout, Scorzetti, Gerson & Sztejnb.	in Boekhout, Theelen, Houbraken, Robert, Scorzetti, Gafni, Gerson & Sztejnberg, Int. J. Syst. Evol. Microbiol. 53(5): 1661 (2003)	2003
66			Meira argovae	isolated from a carmine spide mite on Ricinus communis		Israel	Boekhout et al. 2003: 1662
67	Brachybasidiaceae	valid, type species	Meira geulakonigae	Boekhout, Scorzetti, Gerson & Sztejnb.	in Boekhout, Theelen, Houbraken, Robert, Scorzetti, Gafni, Gerson & Sztejnberg, Int. J. Syst. Evol. Microbiol. 53(5): 1661 (2003)	2003
68			Meira geulakonigae	isolated from citrus rust mite infesting Citrus paradisi		Israel	Boekhout et al. 2003: 1661
69	Brachybasidiaceae	valid	Meira miltonrushii	T.A. Rush & Aime	Antonie van Leeuwenhoek 103(5): 1101 (2013)	2013
70			Meira miltonrushii	isolated from surface of leaf of Magnolia grandiflora		USA	Rush & Aime 2013: 1101
71	Brachybasidiaceae	valid	Meira nashicola	F. Yasuda & H. Otani	in Yasuda, Yamagishi, Akamatsu, Izawa, Kodama & Otani, Mycoscience 47(1): 39 (2006)	2006
72			Meira nashicola	isolated from fruit of Pyrus pyrifolia		Japan	Yasuda et al. 2006: 39
73	Brachybasidiaceae	valid	Meira nicotianae	H-K. Wang & F-C. Lin	in Cao, Li, Zhao, Wang, Jeewon, Bhoyroo, Aruna, Lin, Wang, Phytotaxa 365(2): 176 (2018)	2018
74			Meira nicotianae	isolated from the rhizosphere of tobacco		China	Cao et al. 2018: 176
75	Brachybasidiaceae	valid	Meira siamensis	S. Limtong, Polburee, Chamnanpa, Khunnamwong & P. Limtong	Int. J. Syst. Evol. Microbiol. 67: 2420 (2017)	2017
76			Meira siamensis	isolated from vetiver grass phylloplane		Thailand	Limtong et al. 2017: 2421
77	Brachybasidiaceae	genus	Proliferobasidium	J.L. Cunn.	in Cunningham, Bakshi, Lentz & Gilliam, Mycologia 68(3): 643 (1976)	1976
78	Brachybasidiaceae	valid	Proliferobasidium heliconiae	J.L. Cunn.	in Cunningham, Bakshi, Lentz & Gilliam, Mycologia 68(3): 643 (1976)	1976
79			Proliferobasidium heliconiae	on Heliconia bihai L.	Heliconiaceae	Dominica (Lesser Antilles, British West Indies)	Cunningham et al. 1976: 645
References
Bandoni RJ, Johri BN (1975) Observations on the genus Exobasidiellum. Can J Botany 53:2561–2564. doi:10.1139/b75-282 Barreto RW, Evans HC (1988) Taxonomy of a fungus introduced into Hawaii for biological control of Ageratina riparia (Eupatorieae; Compositae), with observations on related weed pathogens. T Brit Mycol Soc 91:81–97. doi:10.1016/S0007-1536(88)80009-3 Berndt R, Sharma ND (1998) Dicell…
